# Supplementary material for: Photo-Fenton Degradation of Ciprofloxacin by Novel Graphene Quantum Dots/α-FeOOH Nanocomposites for the Production of Safe Drinking Water from Surface Water
Source: MDPI journal article supplement (doi:10.3390/w14142260), 2022-07-20
Supplement: s1 [file s1]

## Supplementary

# Photo-Fenton degradation of ciprofloxacin by novel graphene quantum dots/ $\alpha$ -FeOOH nanocomposites for the production of safe drinking water from surface water

Md. Nahid Pervez<sup>1,2</sup>, Shengjia Ma<sup>1</sup>, Siqi Huang<sup>1</sup>, Vincenzo Naddeo<sup>2\*</sup>, and Yaping Zhao<sup>2\*</sup>

<sup>1</sup> Shanghai Engineering Research Center of Biotransformation of Organic Solid Waste, School of Ecological and Environmental Sciences, East China Normal University, and Institute of Eco-Chongming, Shanghai 200241, China; 595974389@qq.com (S.M.); siqihuang10@gmail.com (S.H.)

<sup>2</sup> Sanitary Environmental Engineering Division (SEED), Department of Civil Engineering, University of Salerno, Fisciano, 84084 Italy; mpervez@unisa.it (M.N.P.)

\* Correspondence: vnaddeo@unisa.it (V. N.); ypzhaoy@des.ecnu.edu.cn (Y.Z.); Tel.: +39 089 96 6333 (V.N.); +86 021-54341241 (Y.Z.)

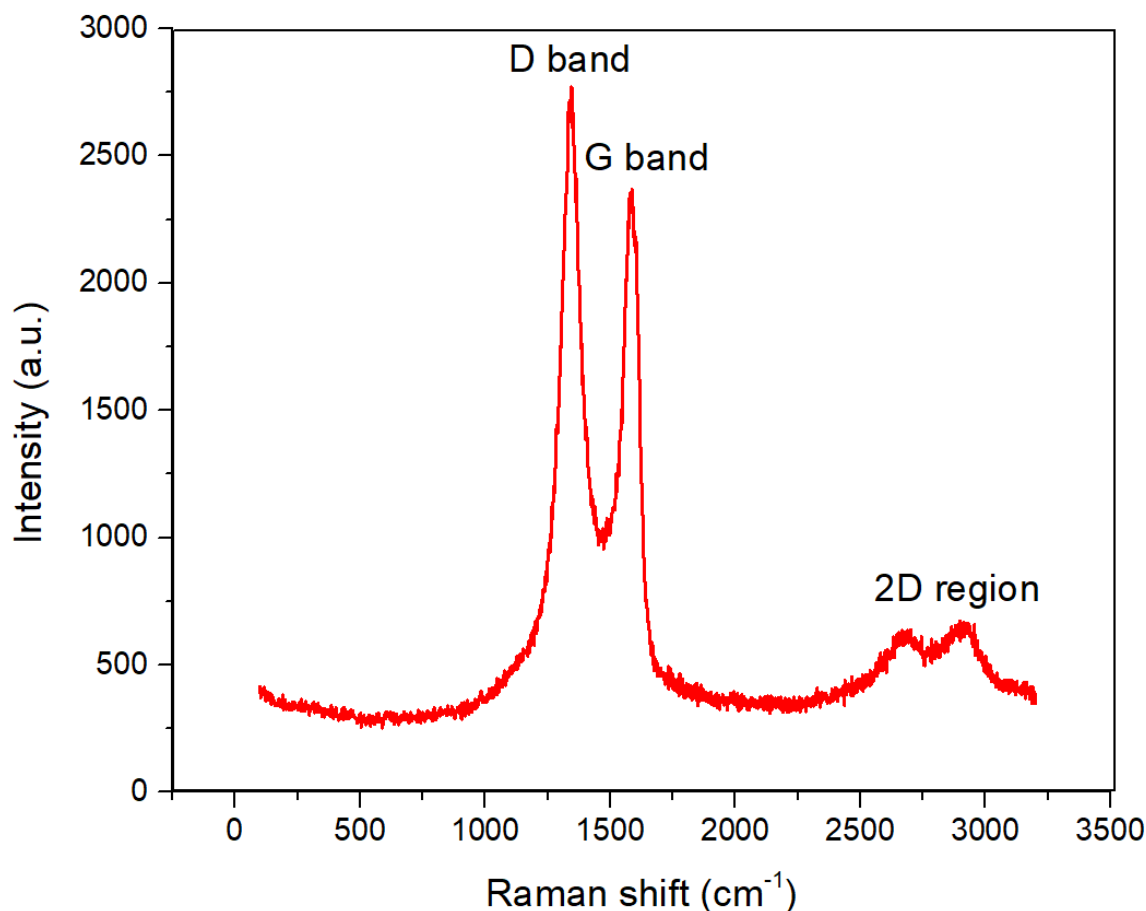

Figure S1. Raman spectra of rGO

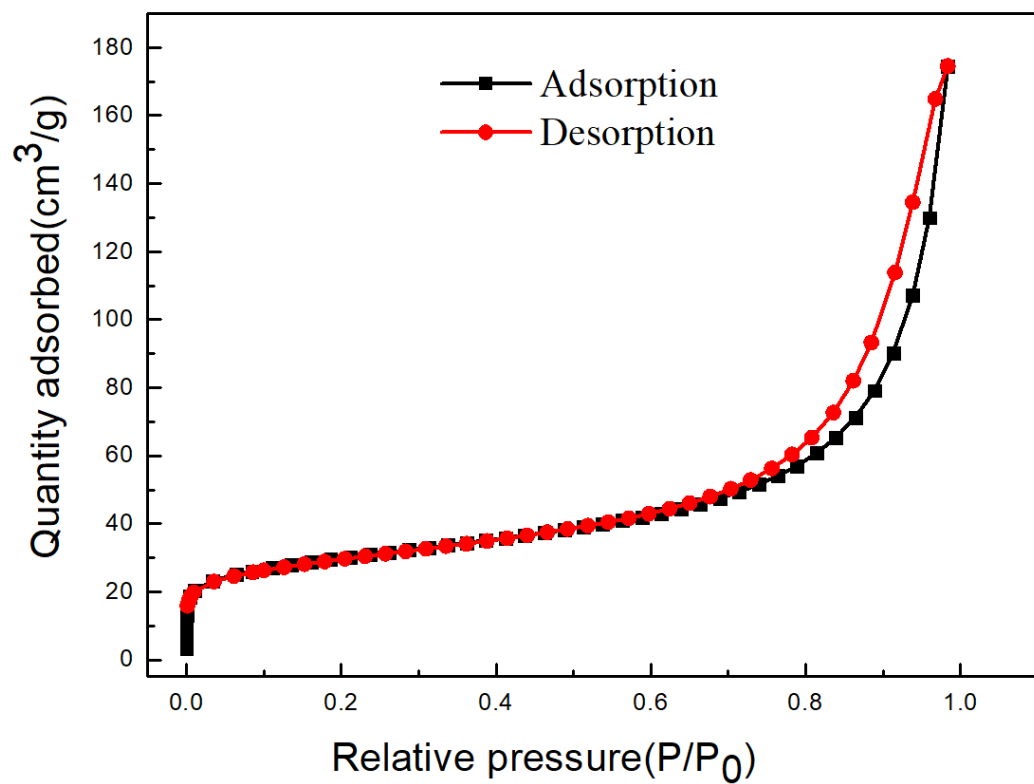

Figure S2. Nitrogen adsorption-desorption isotherms of GQDs/ $\alpha$ -FeOOH
